# Supplementary figures and images for: Rapid Test for Adulteration of Fritillaria Thunbergii in Fritillaria Cirrhosa by Laser-Induced Breakdown Spectroscopy
Source: MDPI journal article supplement (doi:10.3390/foods12081710), 2023-04-20

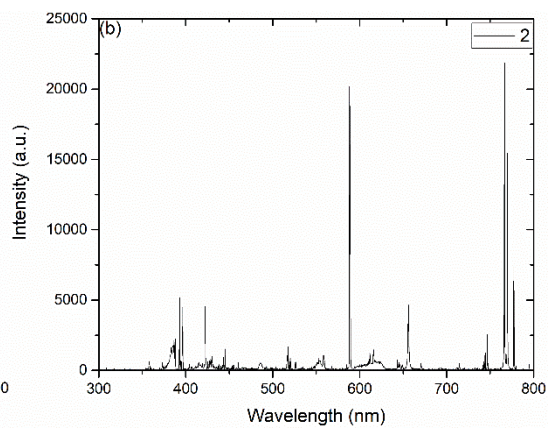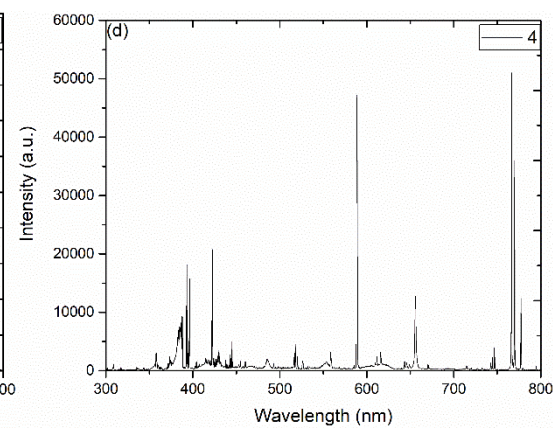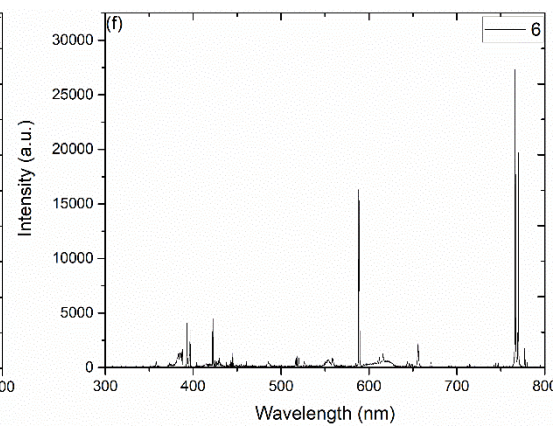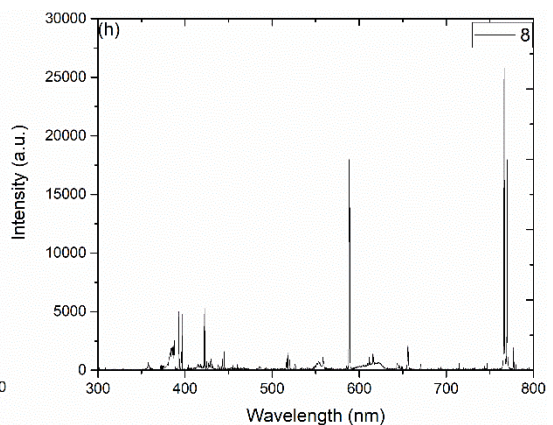



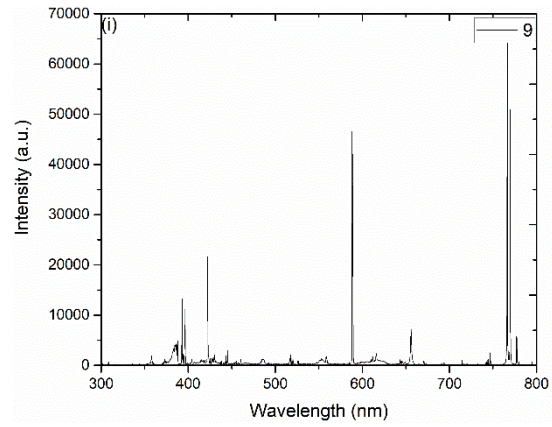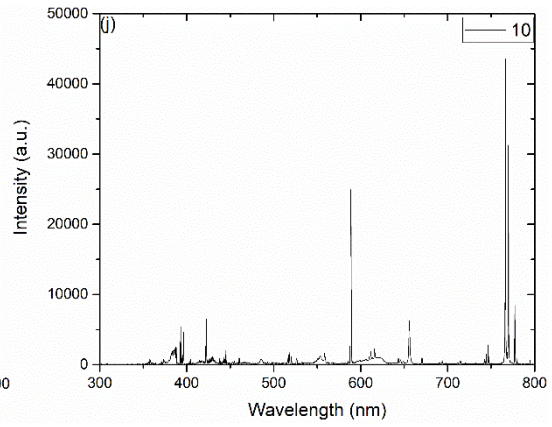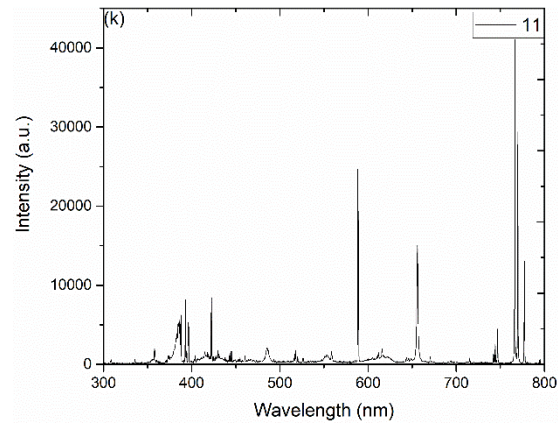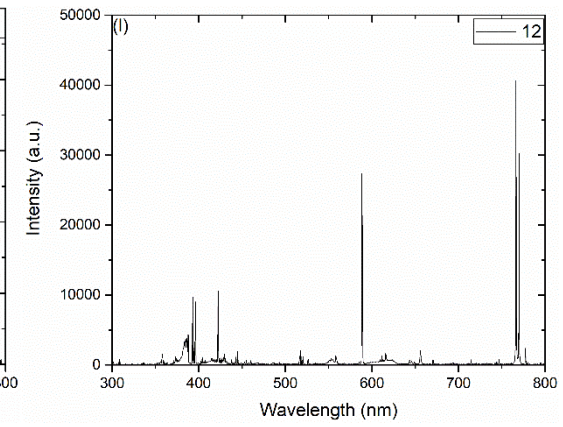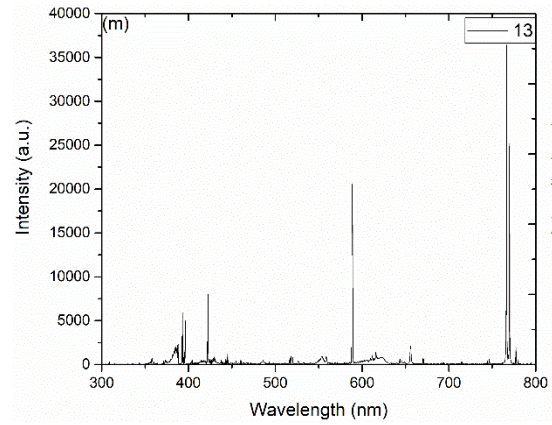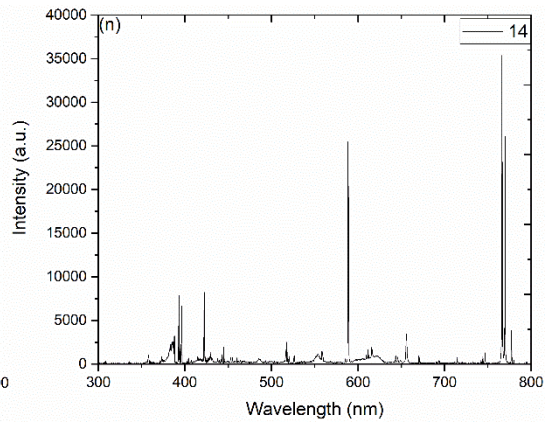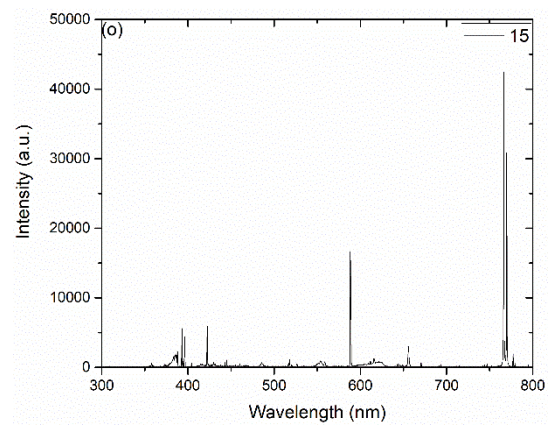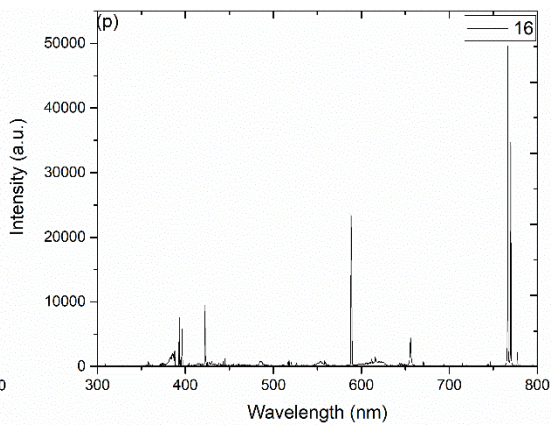

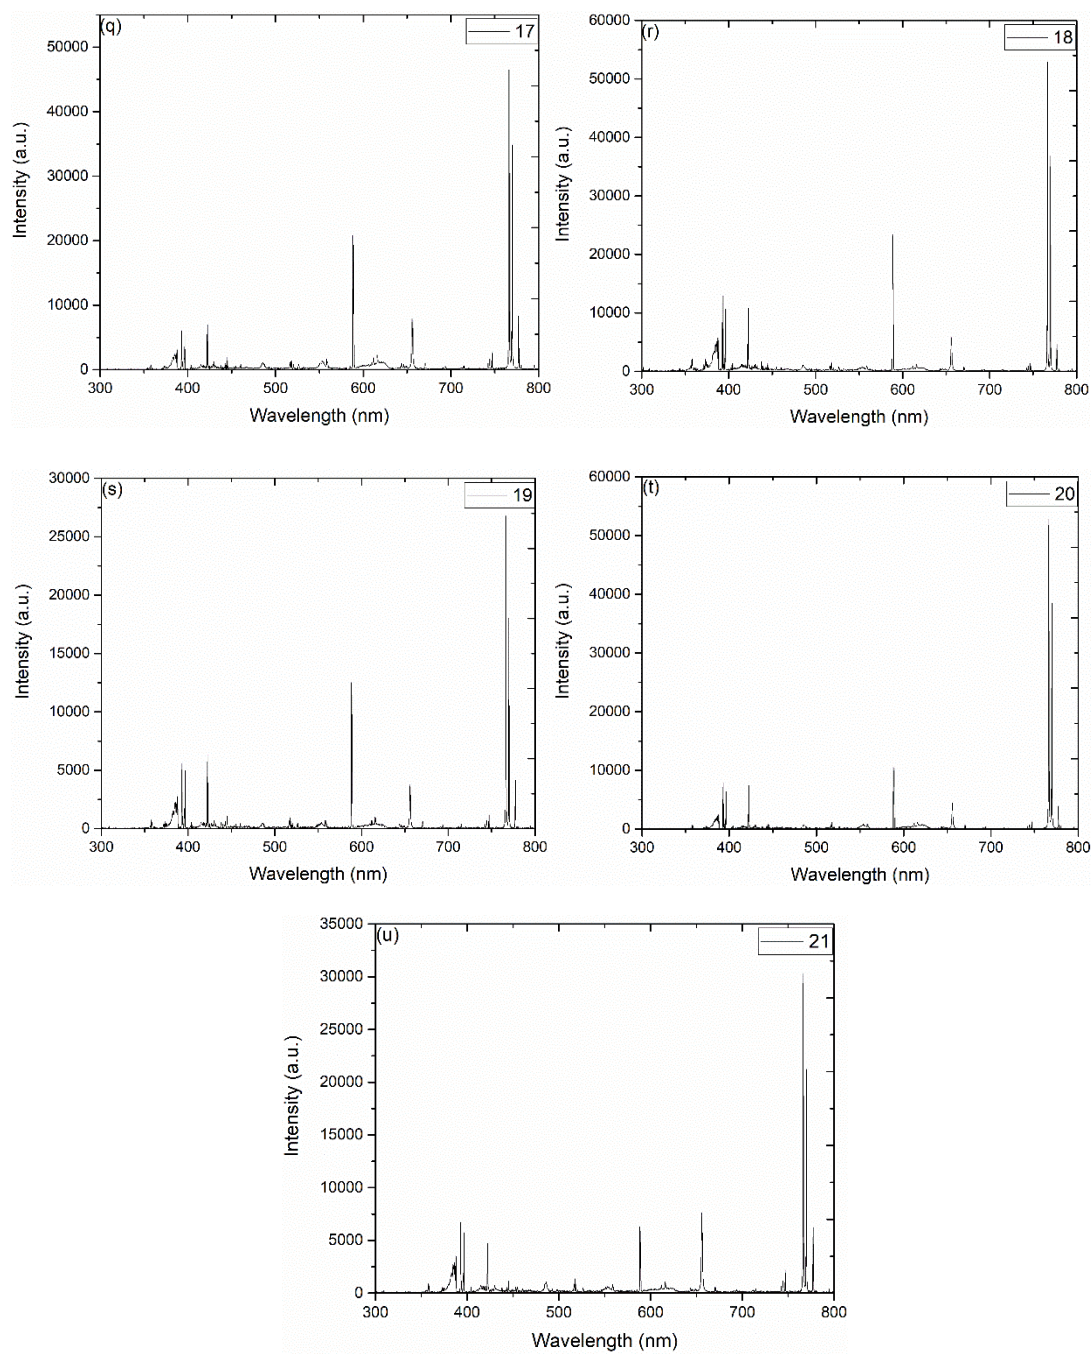

**Figure S1.** Typical LIBS spectra of 21 experimental samples with different doping levels.

Supplement: s1 [file s1]
